# Supplementary material for: Band alignment in CdS–α-Te van der Waals heterostructures for photocatalytic applications: influence of biaxial strain and electric field
Source: Royal Society of Chemistry journal article supplement (doi:10.1039/d4cp03368j), 2024-01-01
Supplement: d4cp03368j1.pdf [file d4cp03368j1.pdf]

# Band alignment in CdS- $\alpha$ -Te van der Waals heterostructures for photocatalytic applications: Influence of biaxial strain and electric field

G. Tejaswini<sup>a</sup>, Anjana E Sudheer<sup>a</sup>, M. Vallinayagam<sup>b,c</sup>, M. Posselt<sup>c</sup>, M. Zschornak<sup>b,c</sup>, S Maniprakash<sup>a</sup>, and D. Murali<sup>a\*</sup>

<sup>a</sup> Indian Institute of Information Technology Design and Manufacturing, Kurnool, India.

E-mail: dmurali@iiitk.ac.in

<sup>b</sup> IEP, TU Bergakademie Freiberg, 09599 Freiberg, Germany

<sup>c</sup> Fakultät Maschinenbau/Energietechnik/Physik, Hochschule für Technik und Wirtschaft 01069 Dresden, Germany

<sup>d</sup> Helmholtz-Zentrum Dresden-Rossendorf, Institute of Ion Beam Physics and Materials Research, 01328 Dresden, Germany

## Supplementary Information

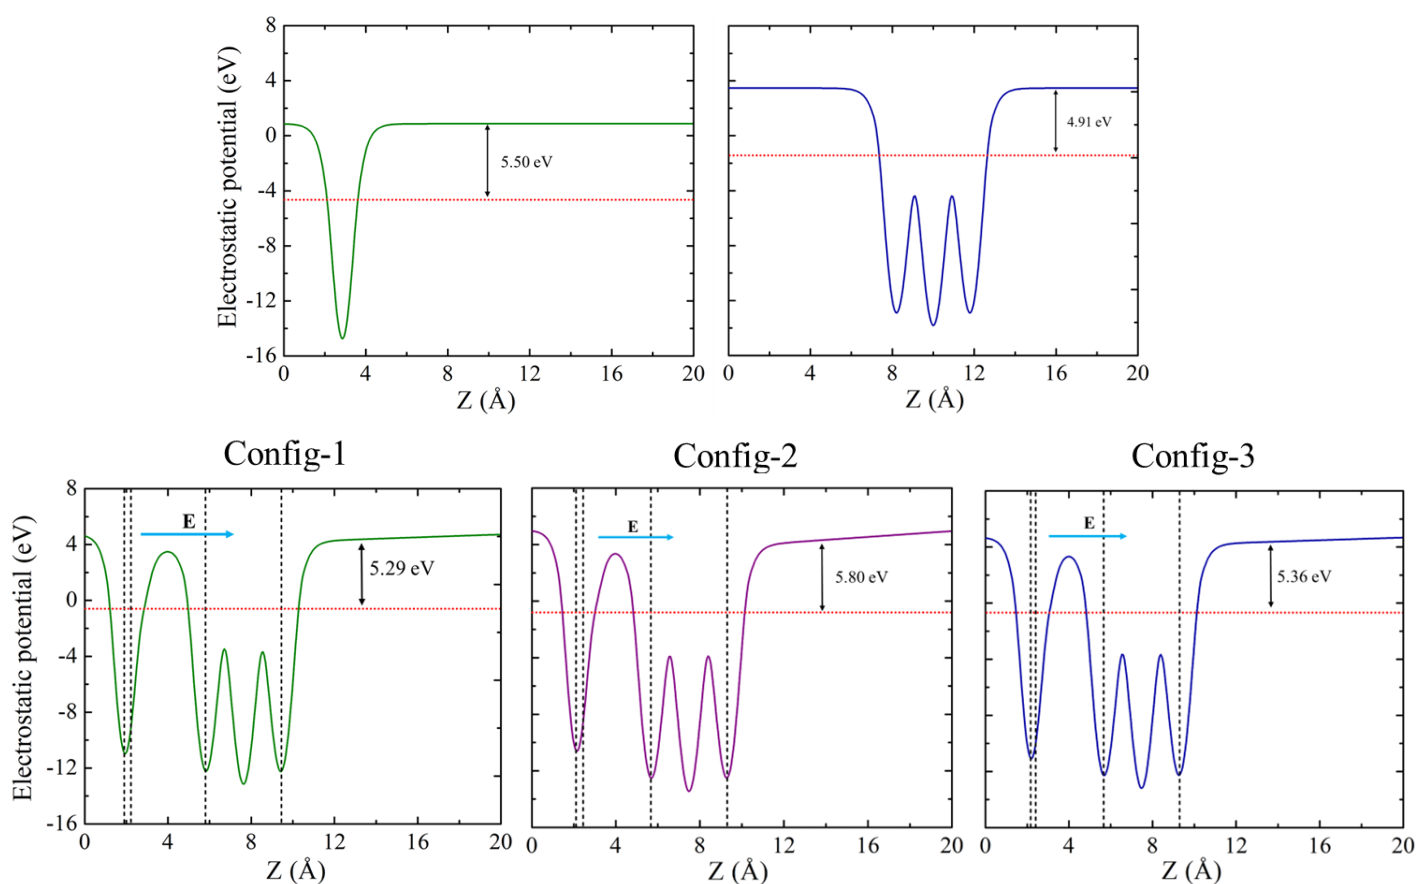

SFig. 1: The electrostatic potential of the CdS,  $\alpha$ -Te SLs and the three configurations of the CdS-  $\alpha$ -Te heterostructure. The vertical dashed lines represent the boundaries of the CdS (left) and  $\alpha$ -Te (right) layers. The light blue arrow denotes the direction of the built-in electric field  $E$ . The red dotted line represents the Fermi-level. The results presented here are within the GGA approximation.

STable 1: Vacuum level and work functions of CdS and  $\alpha$ -Te SLs and CdS- $\alpha$ -Te heterostructure.

| Structure    | Vacuum level (eV) | Work function (eV) |
|--------------|-------------------|--------------------|
| CdS          | 0.86              | 5.50               |
| $\alpha$ -Te | 3.44              | 4.91               |
| Config-1     | 4.71              | 5.29               |
| Config-2     | 4.98              | 5.80               |
| Config-3     | 4.68              | 5.36               |

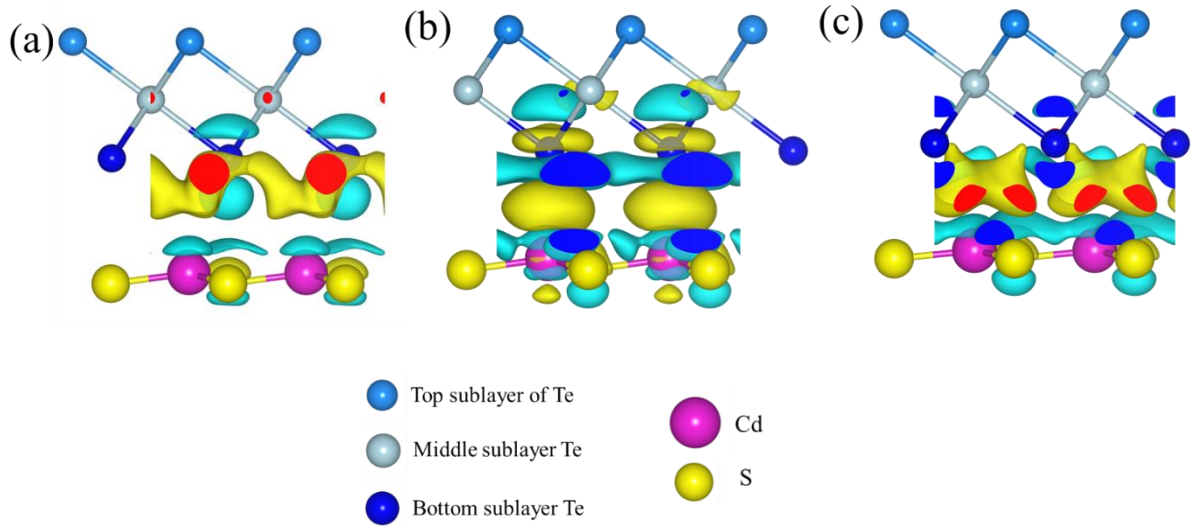

SFig. 2: Differential electron density representation in (a) config-1, (b) config-2 and (c) config-3 of the CdS- $\alpha$ -Te heterostructure with isosurface level  $0.0002 \text{ e}/\text{\AA}^3$ . The yellow and cyan colored regions around the atoms represents the electron accumulation and depletion respectively. Note, that the red and dark blue areas solely denote cross-sections of yellow and cyan regions with the plane of the picture.

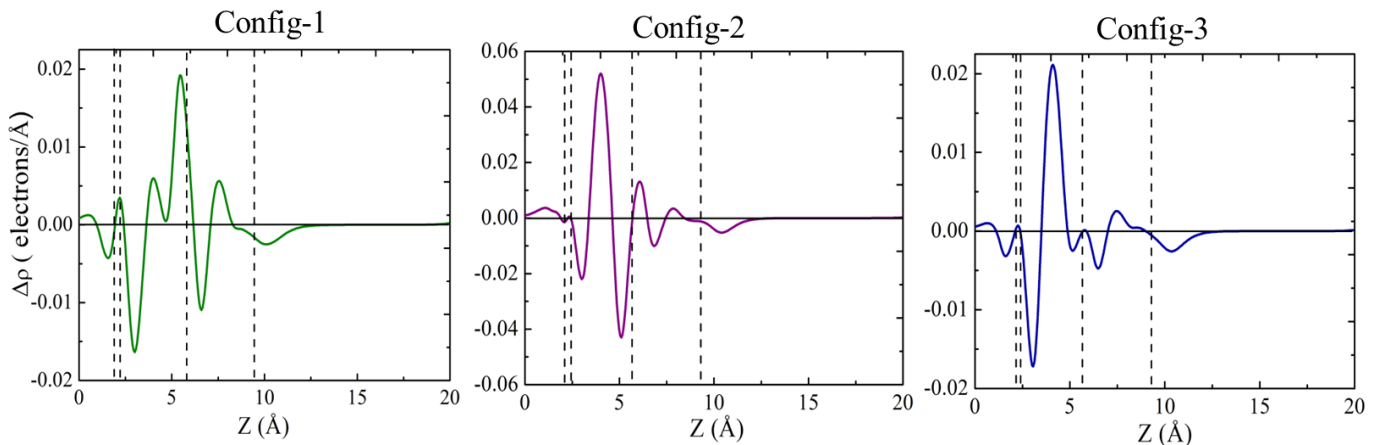

SFig. 3: Planar averaged electron density difference in the three configurations of the CdS- $\alpha$ -Te heterostructure. Vertical dashed lines mark the CdS and  $\alpha$ -Te regions. The positive and negative values represent the electron accumulation and depletion respectively.

STable 3: Interlayer distance variation with reference to applied biaxial strain in the three configurations of the CdS-  $\alpha$ -Te heterostructure.

| Strain (%) | Interlayer distance ( $\text{\AA}$ ) |          |          |
|------------|--------------------------------------|----------|----------|
|            | Config-1                             | Config-2 | Config-3 |
| -5         | -                                    | 3.00     | 3.10     |
| -4         | 3.43                                 | 3.08     | 3.13     |
| -3         | 3.47                                 | 3.14     | 3.16     |
| -2         | 3.51                                 | 3.19     | 3.18     |
| -1         | 3.55                                 | 3.23     | 3.21     |
| 0          | 3.59                                 | 3.23     | 3.25     |
| 1          | 3.62                                 | 3.27     | 3.24     |
| 2          | 3.65                                 | 3.26     | 3.25     |
| 3          | 3.67                                 | 3.25     | 3.24     |
| 4          | 3.69                                 | 3.23     | 3.22     |
| 5          | -                                    | 3.20     | 3.20     |

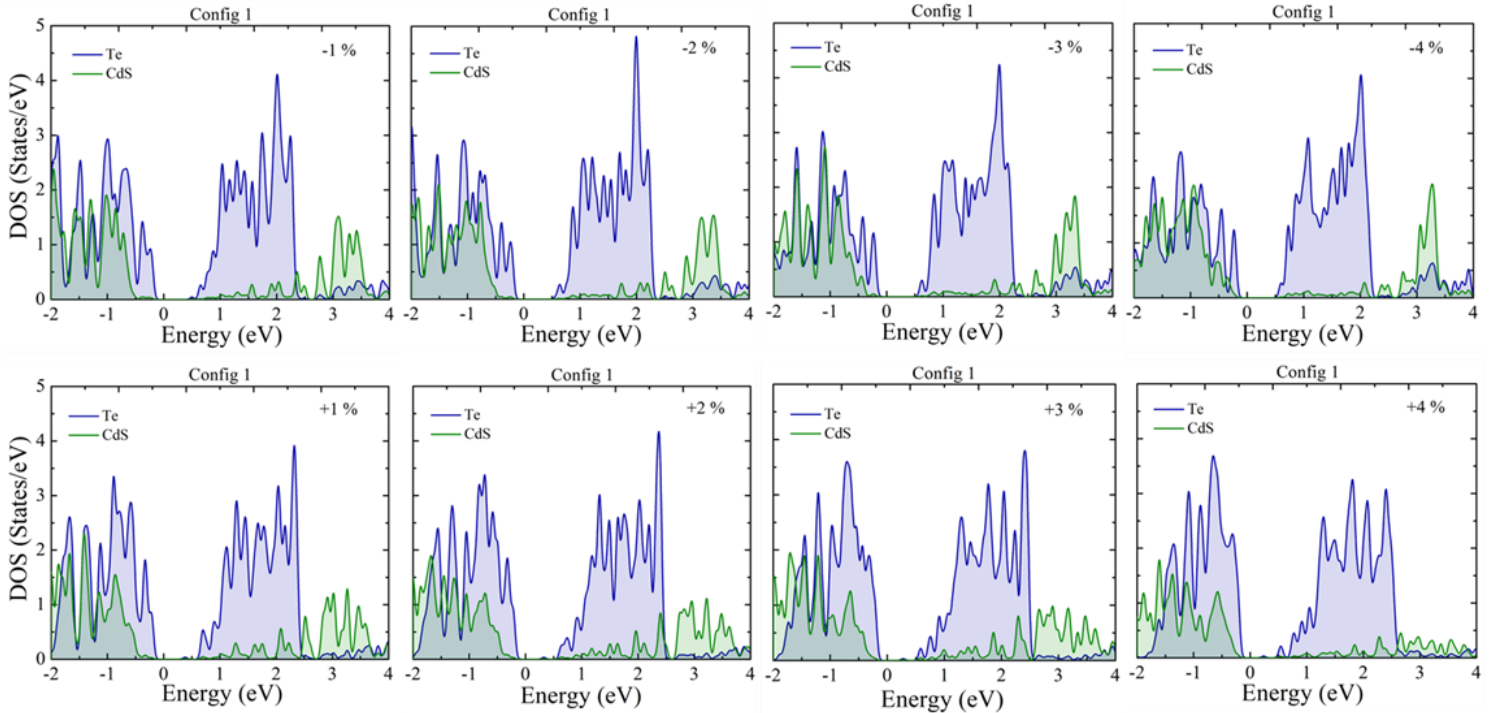

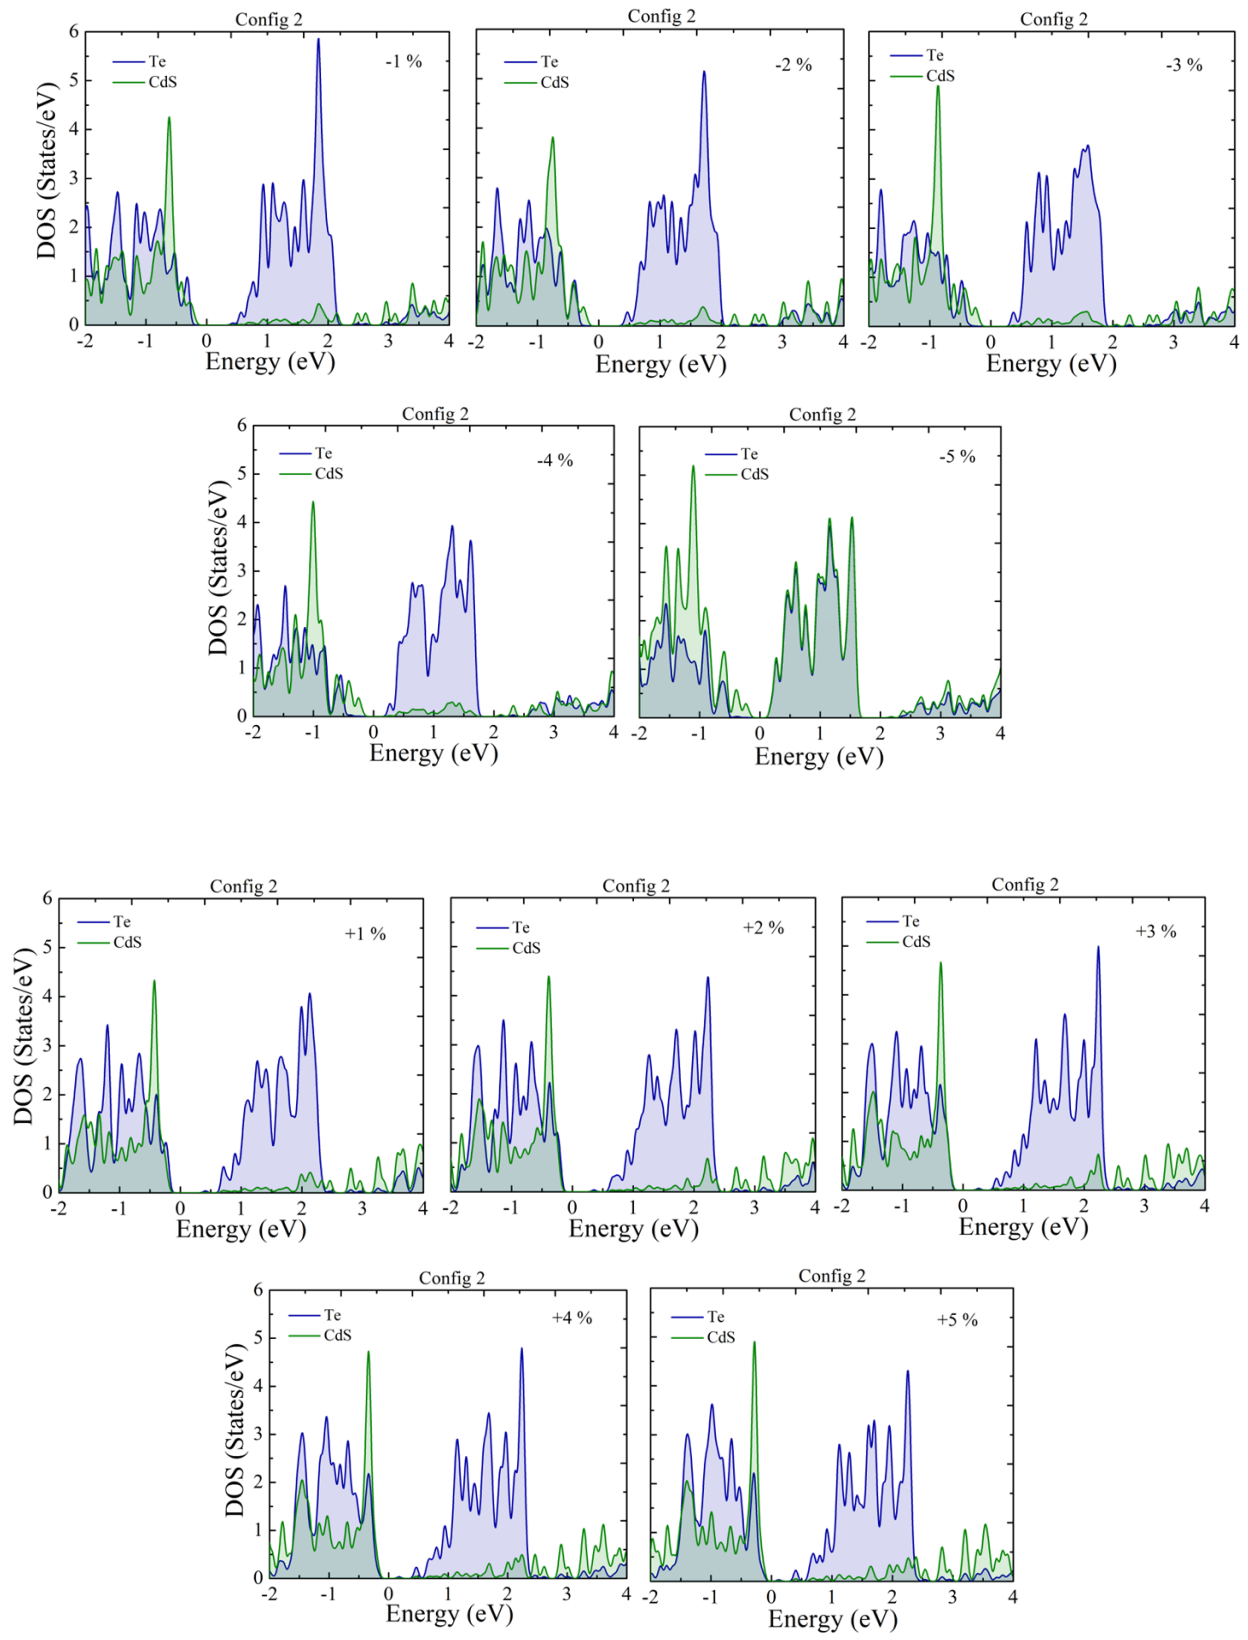

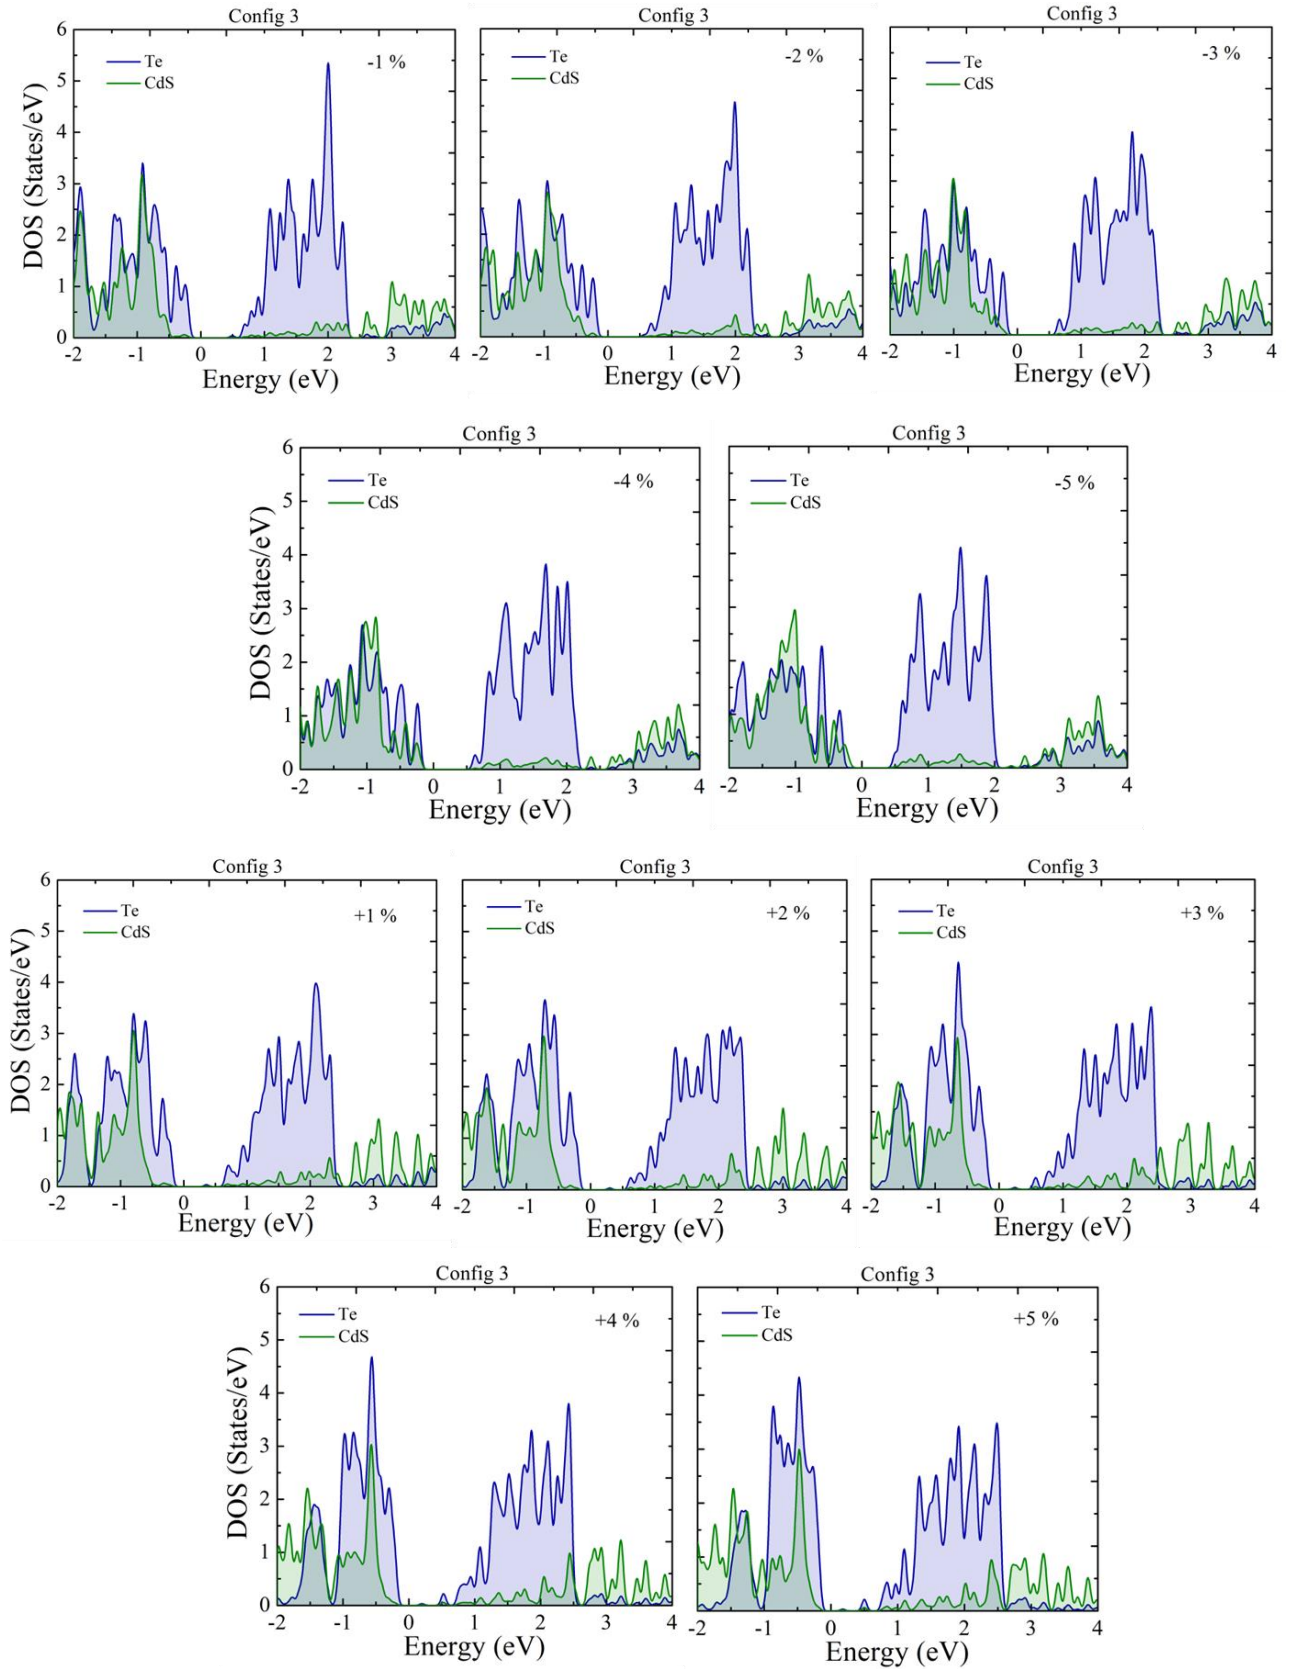

SFig 4: The evolution of layer resolved density (LDOS) of states of the three configurations of the CdS- $\alpha$ -Te heterostructure with respect to applied biaxial strain. The negative and positive strain values represent the compression and tension respectively. The Fermi-level is set to zero.



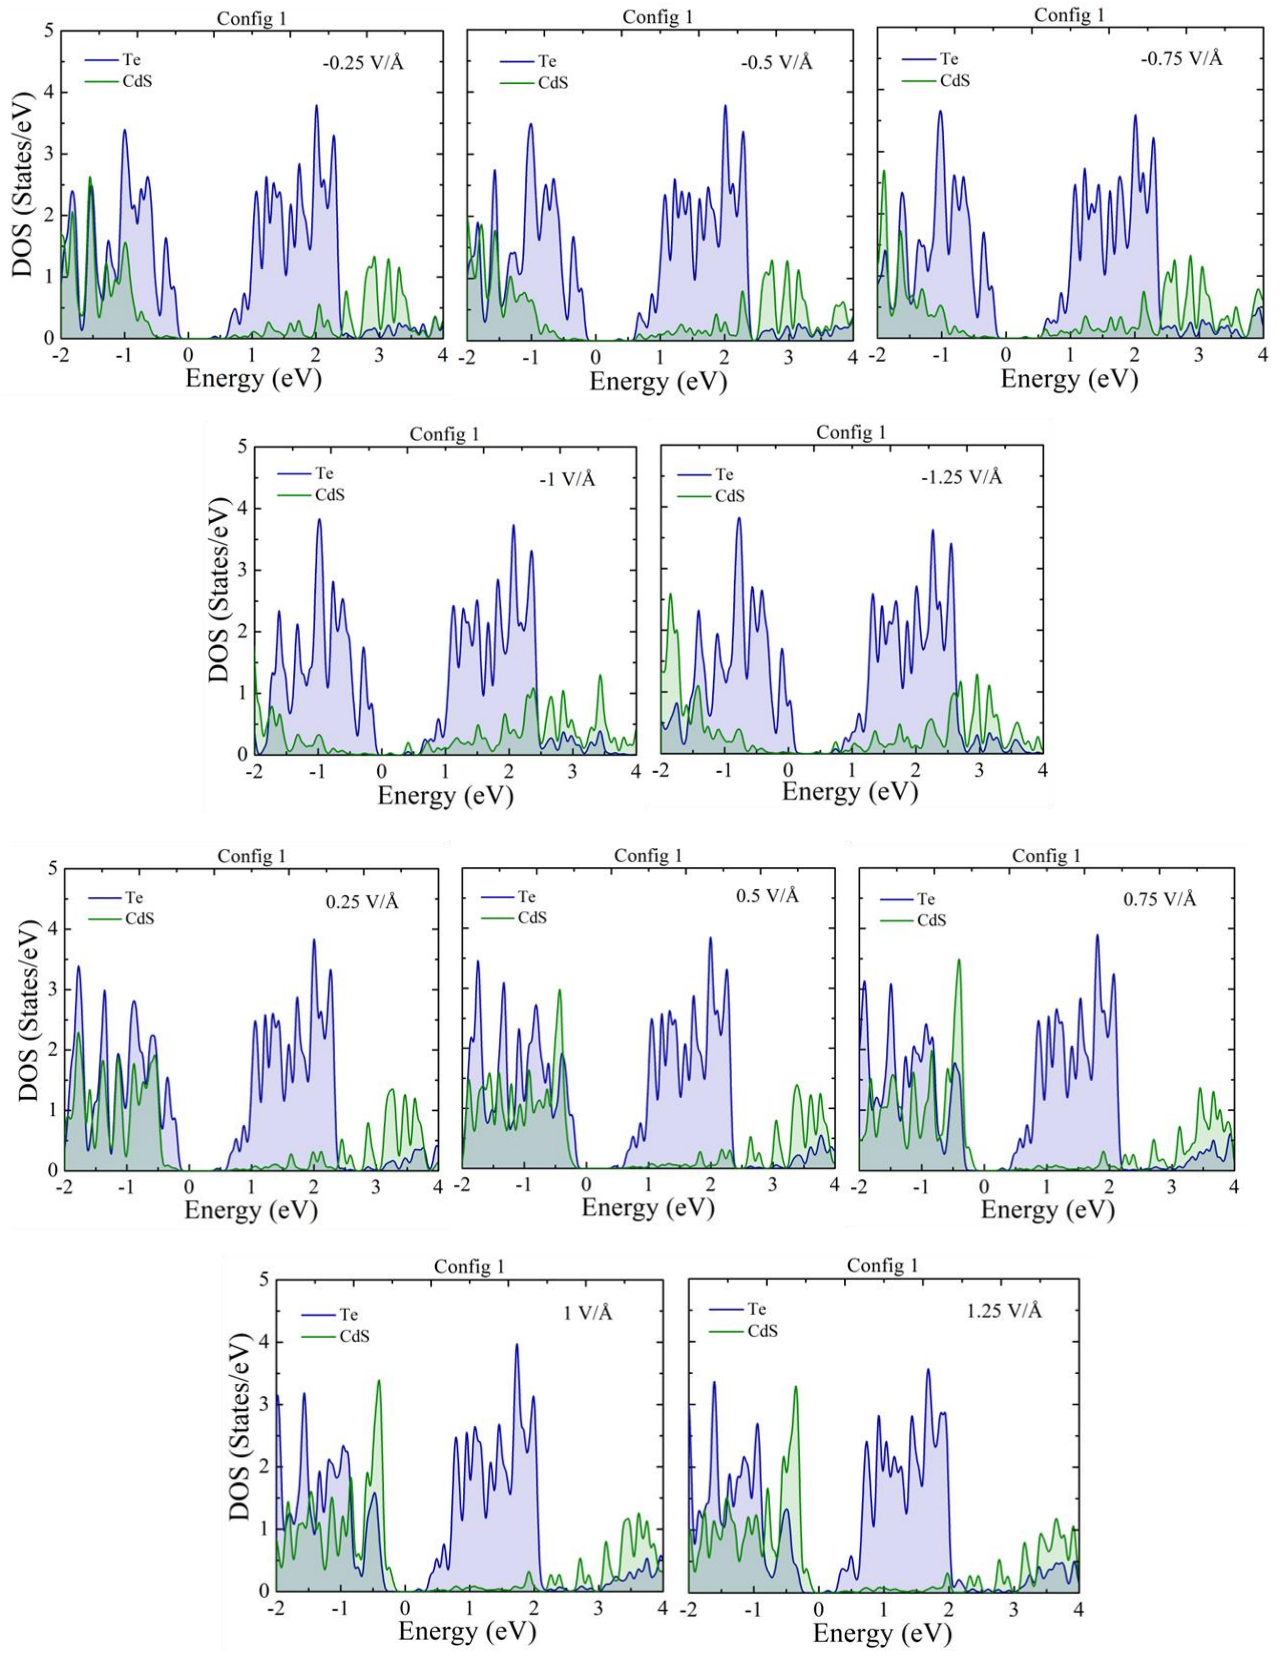

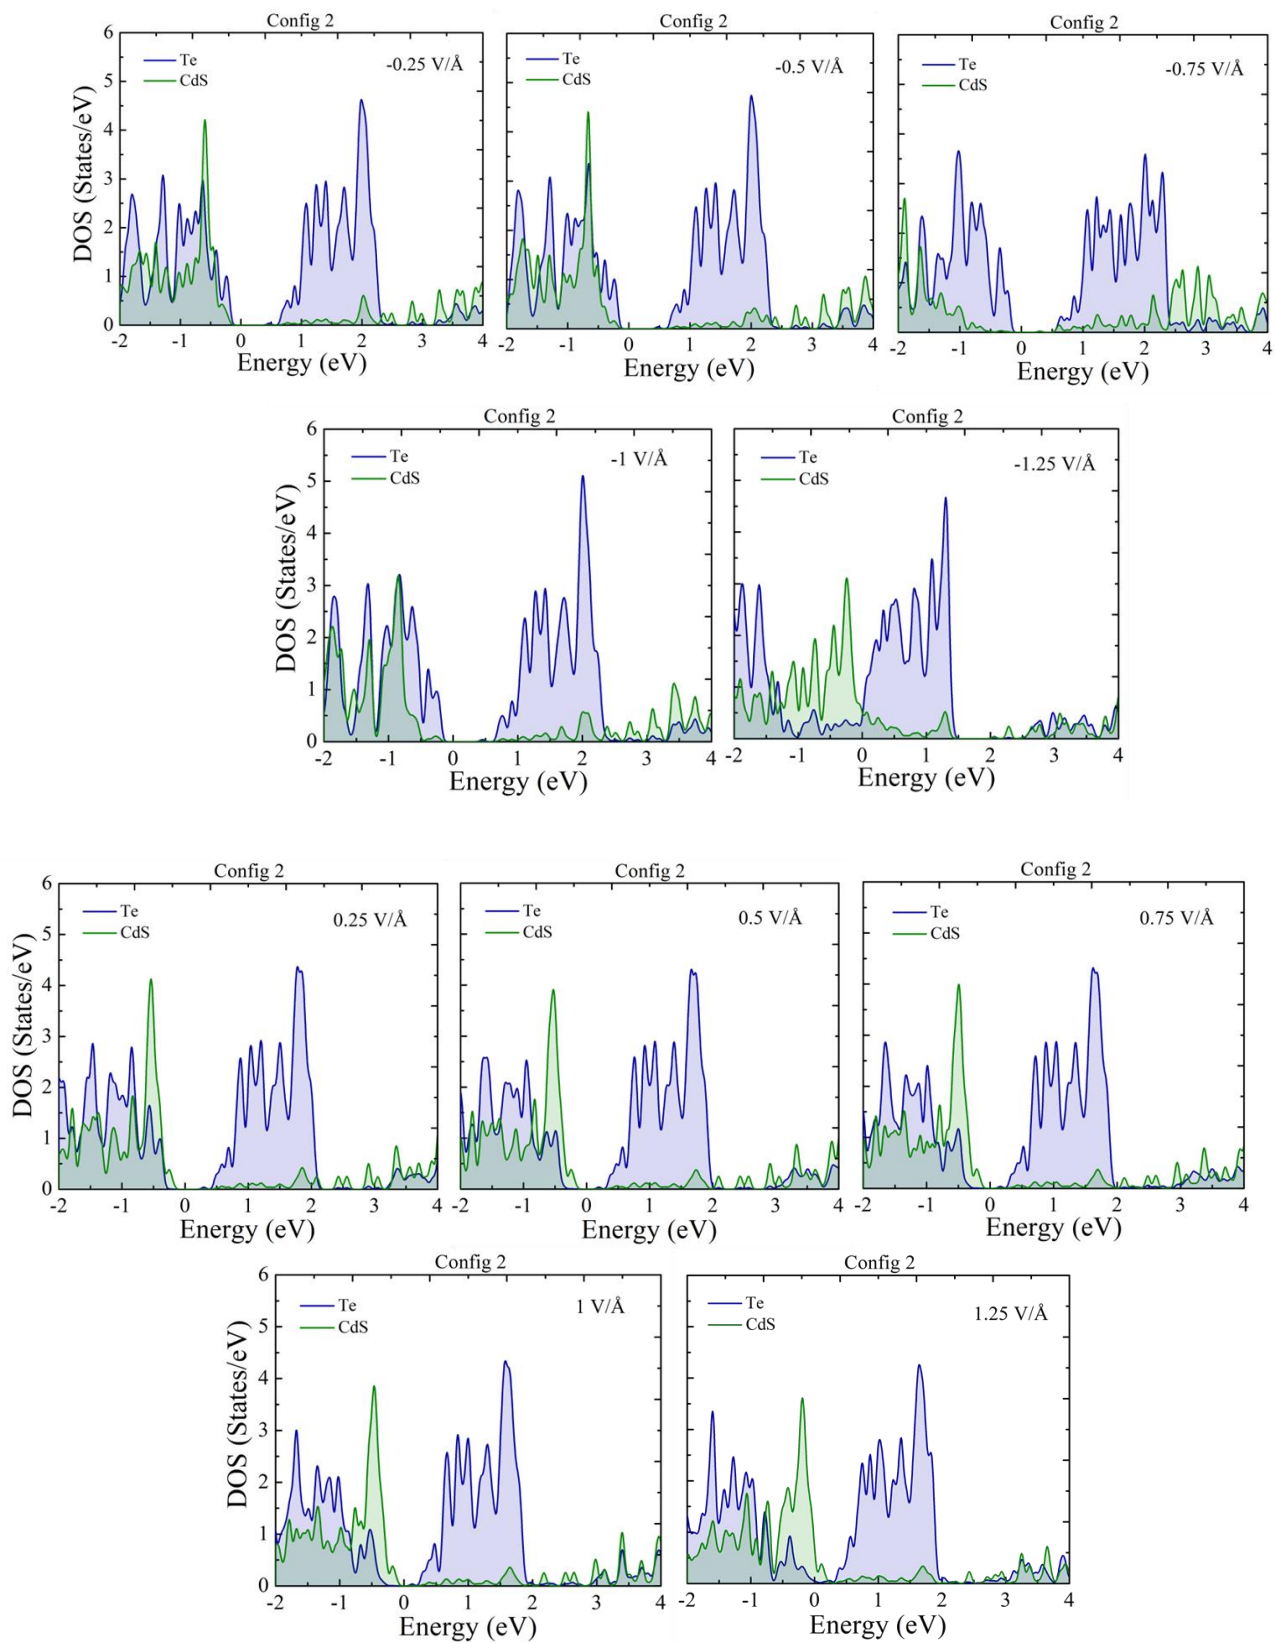

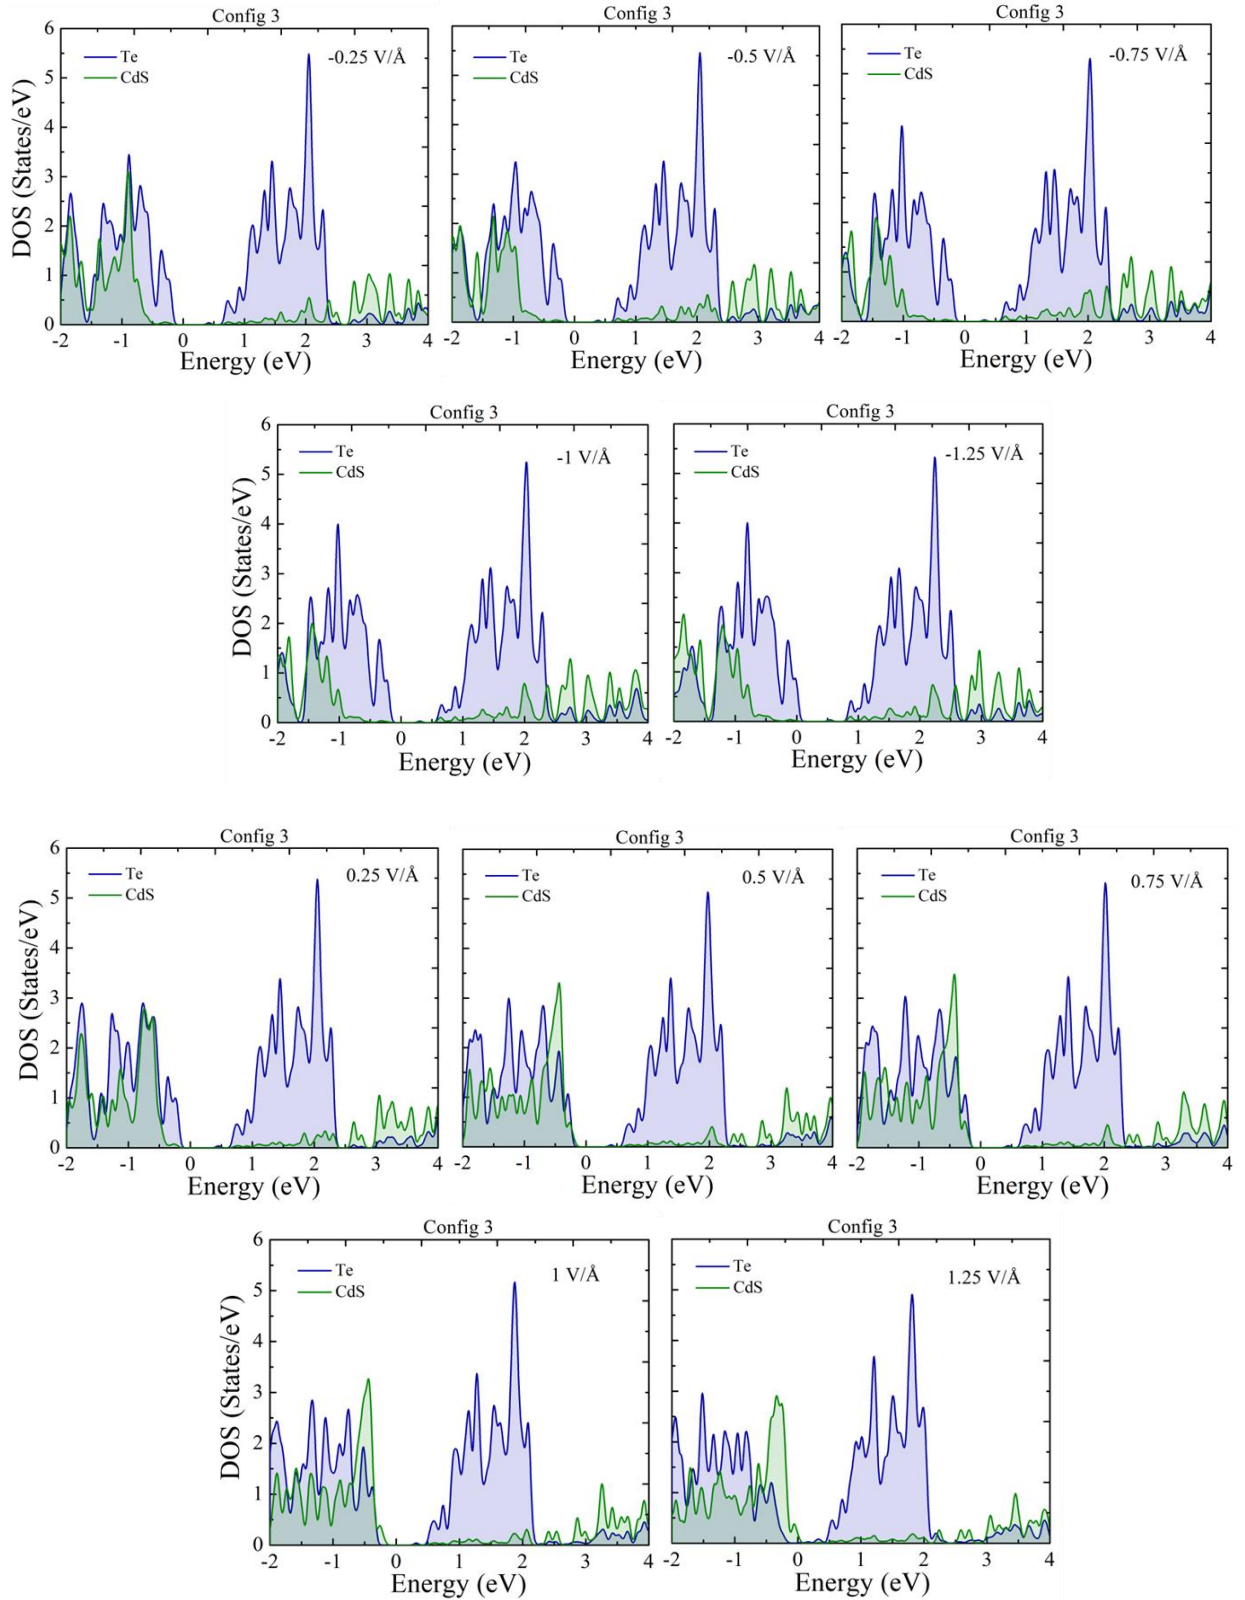

SFig. 5: The evolution of layer resolved density of states of the three configurations of the CdS- $\alpha$ -Te interface with respect to applied electric field. The negative and positive electric field values represent the direction of the fields pointing along negative and positive z-axis, respectively. The Fermi-level is set to zero. These are the results when the ionic relaxation is not performed.



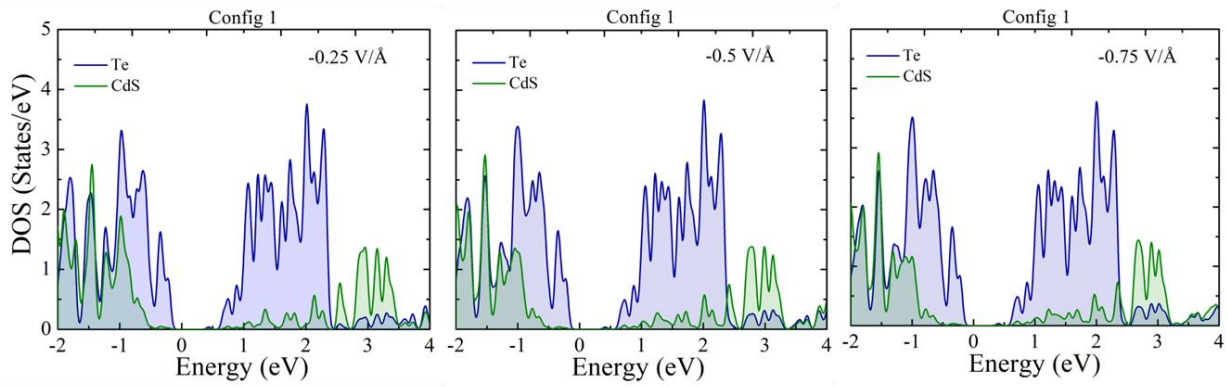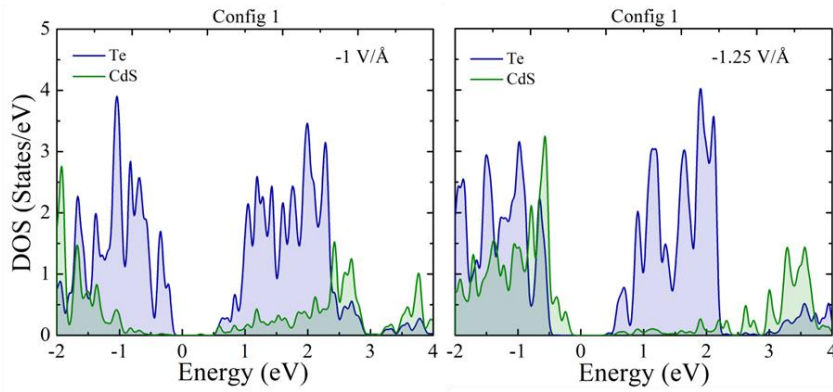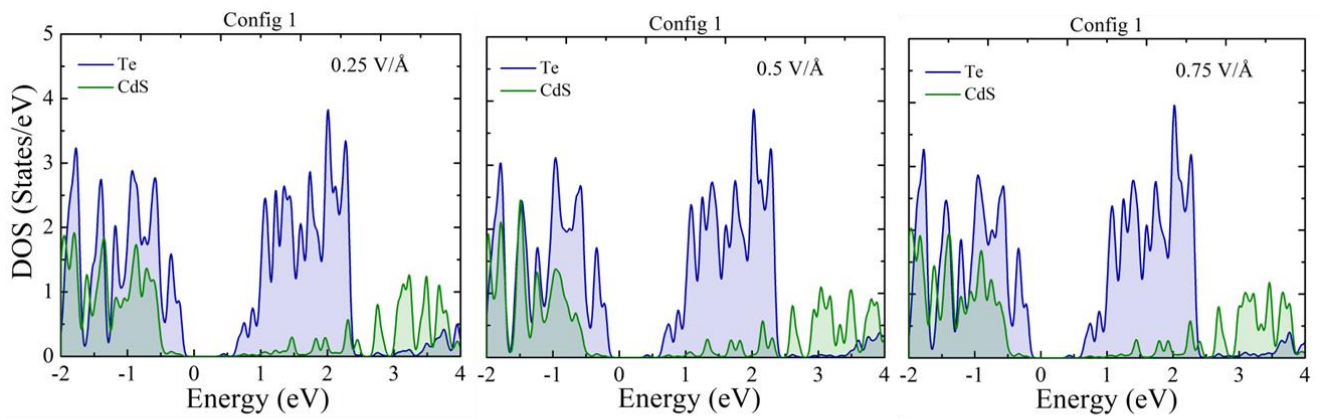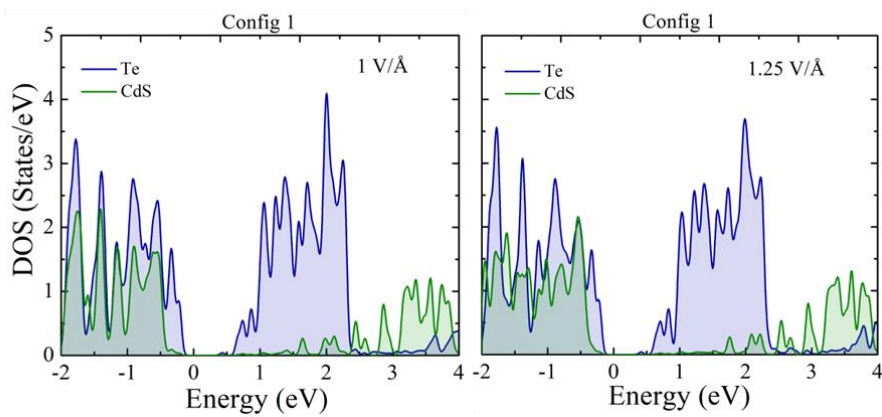

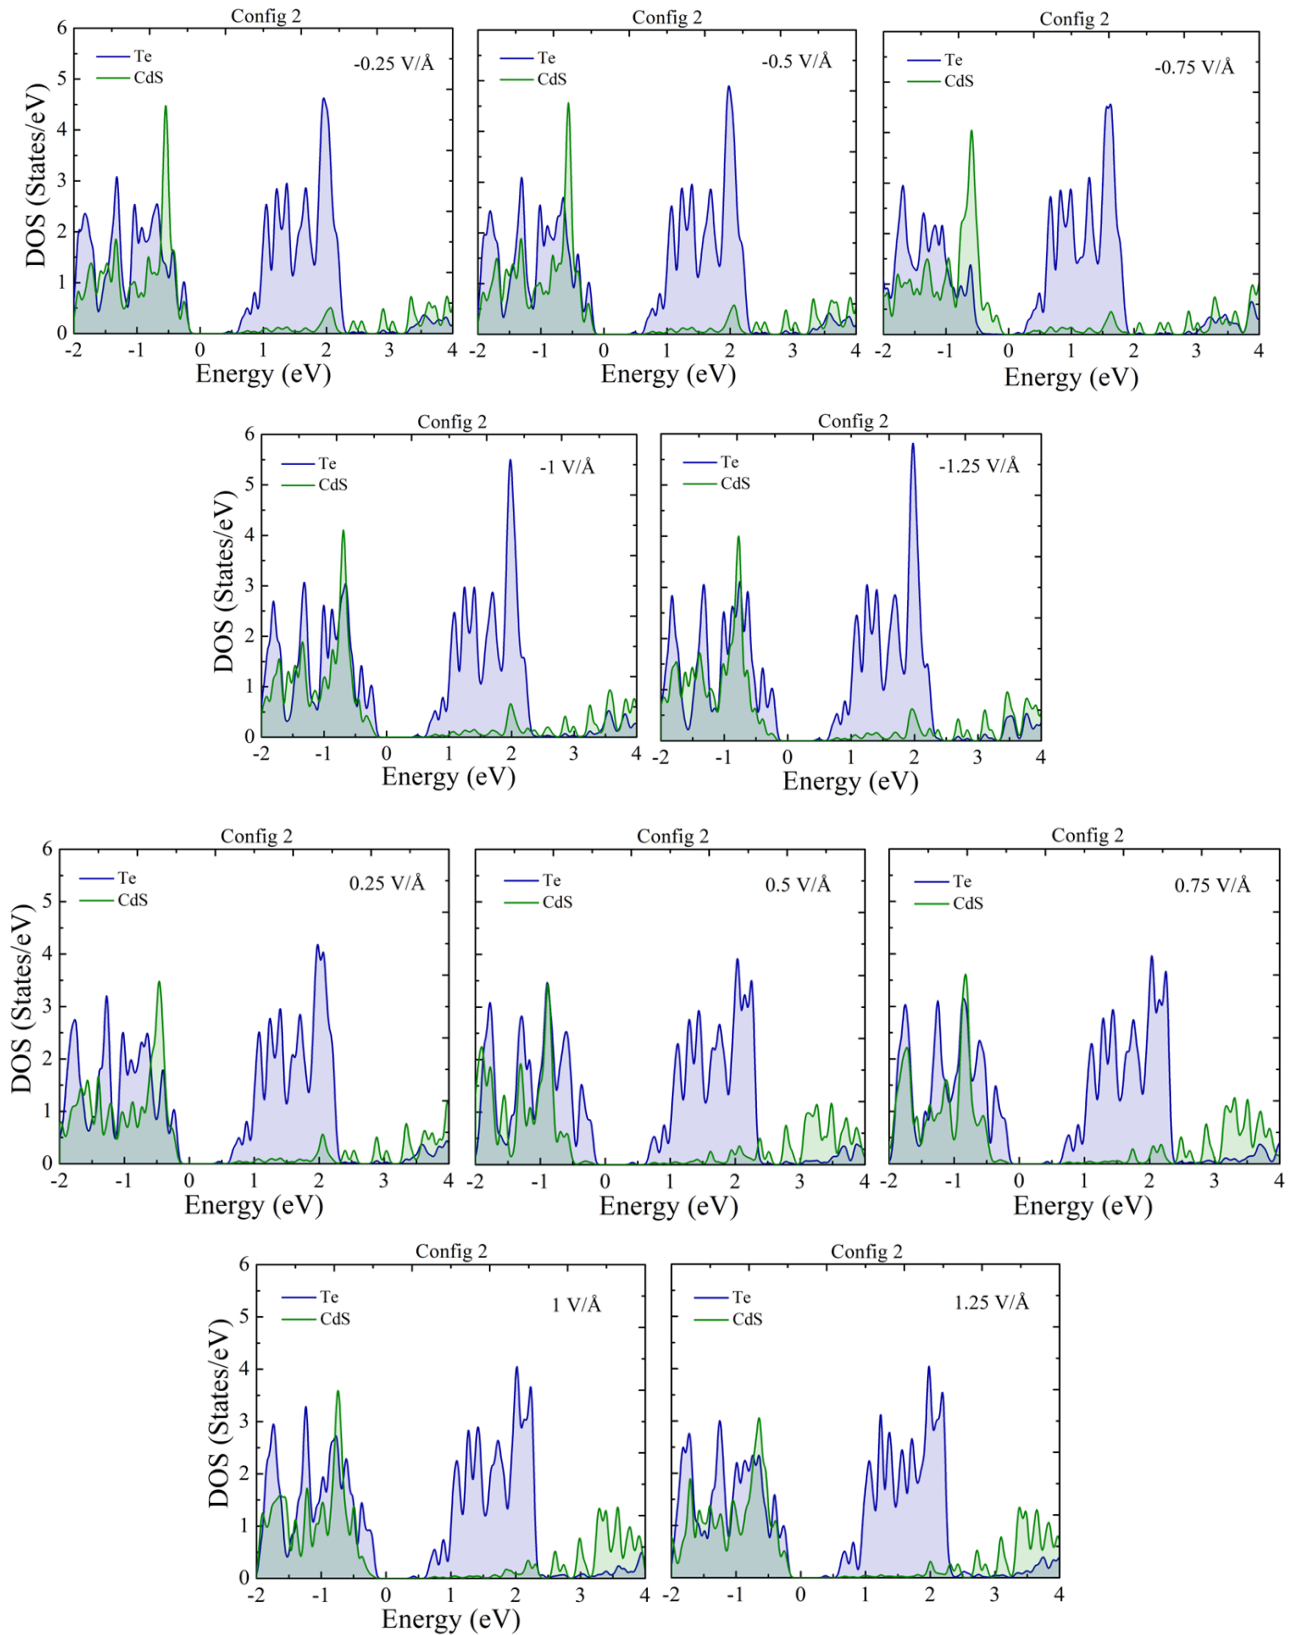

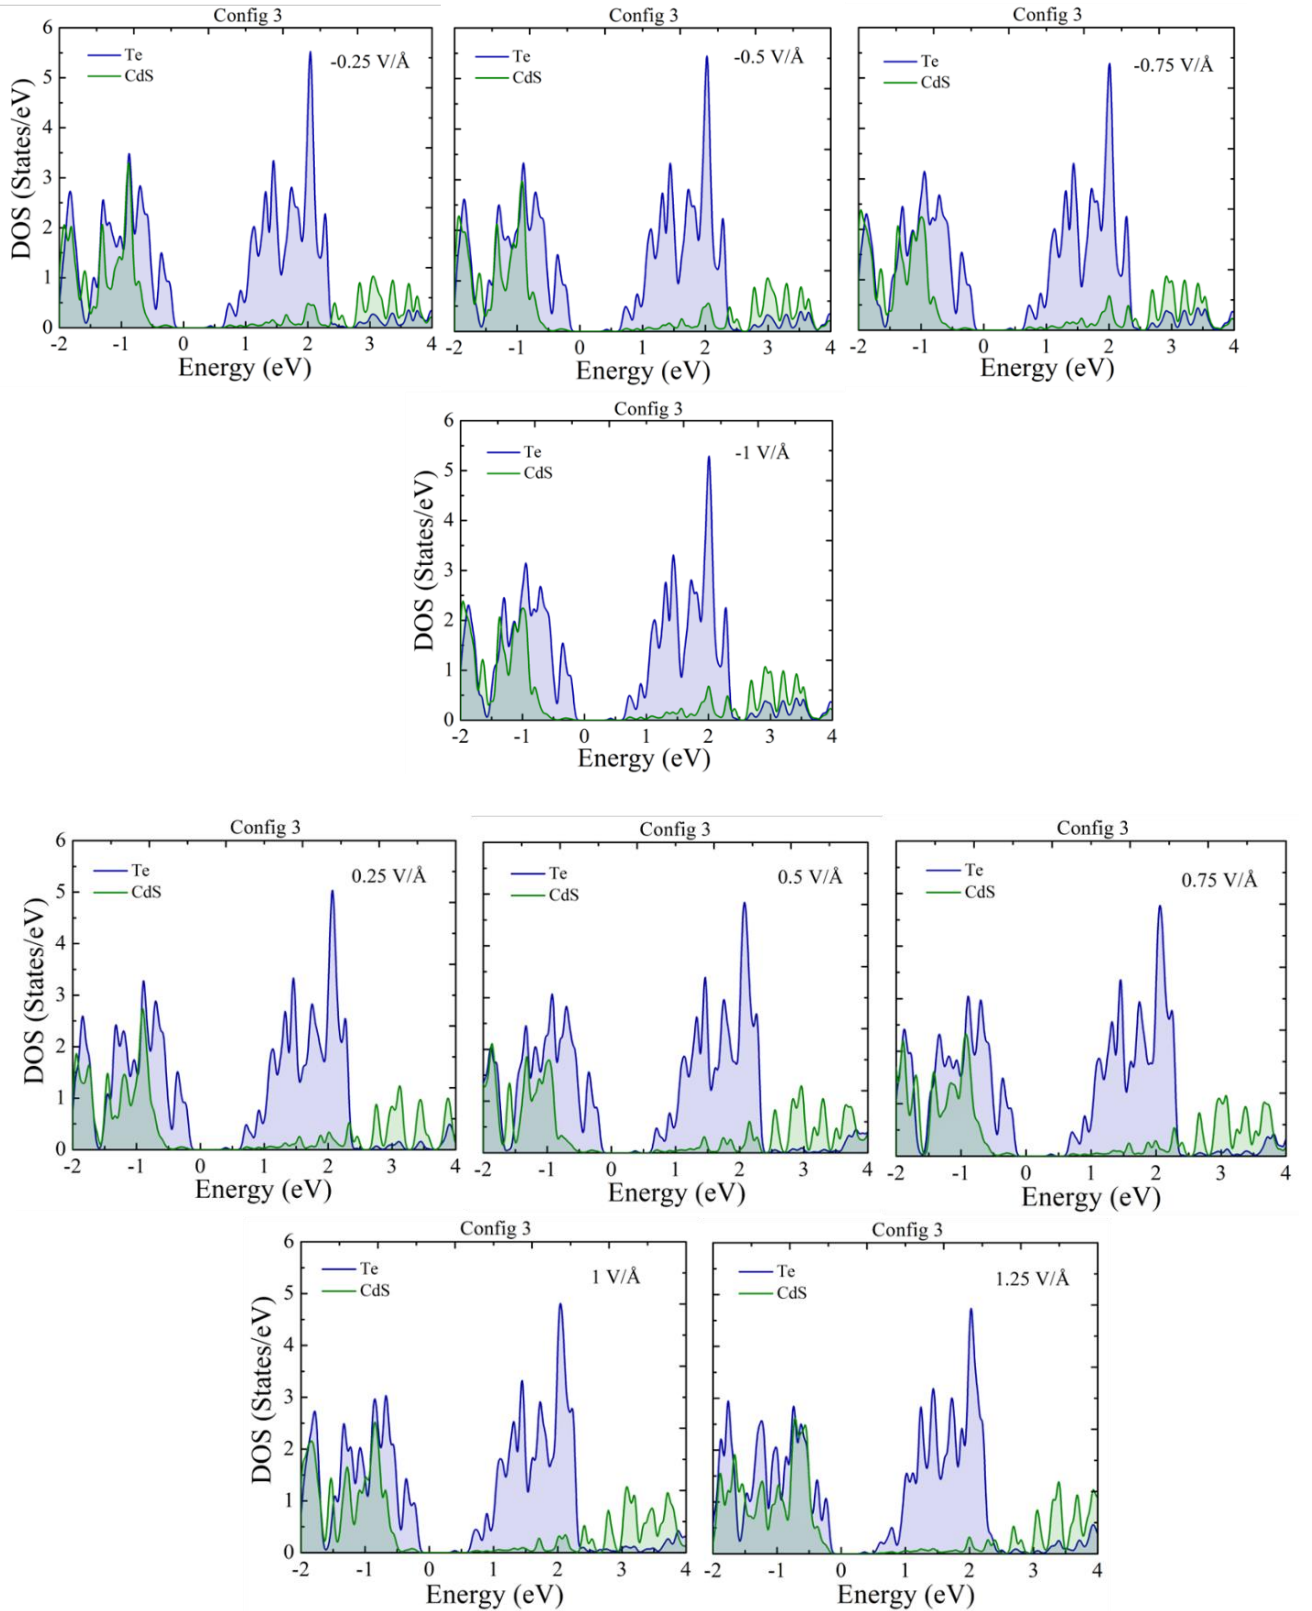

SFig. 6: The evolution of layer resolved density of states of the CdS- $\alpha$ -Te heterostructure with respect to applied electric field. The negative and positive electric field values represent the direction of the fields pointing along negative and positive z-axis, respectively. The Fermi-level is set to zero. These are the results when the ionic relaxation is performed.
